# Supplementary material
Source: PubMed Central journal article supplement (PMC4639795)
Supplement: ncomms9487-s1.pdf [file ncomms9487-s1.pdf]

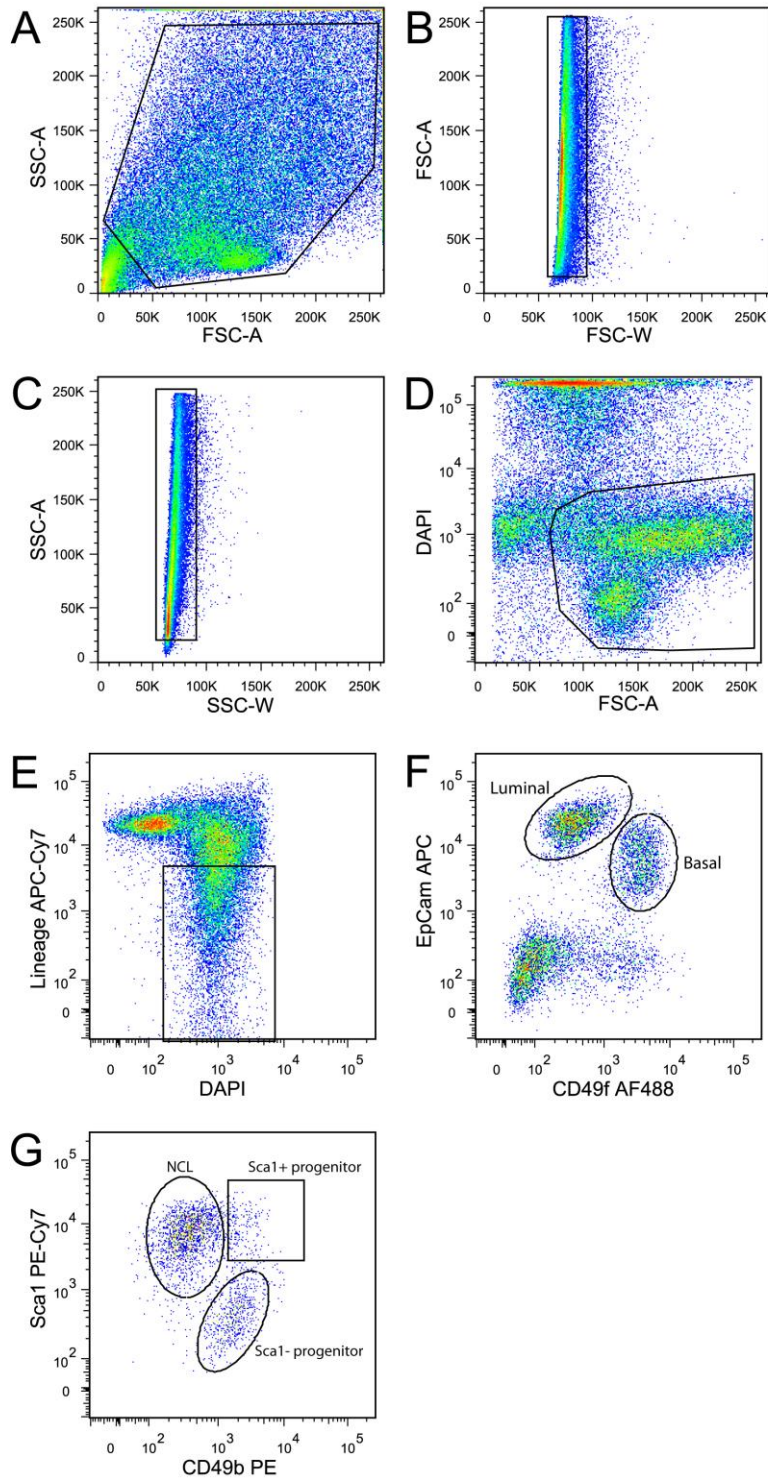

**Supplementary Figure 1. Flow cytometry gating.** Gating strategy showing the identification and purification of viable basal, Sca1- progenitors, Sca1+ progenitors and NCL cells. The events in panel G are gated on the luminal cell population shown in panel F.

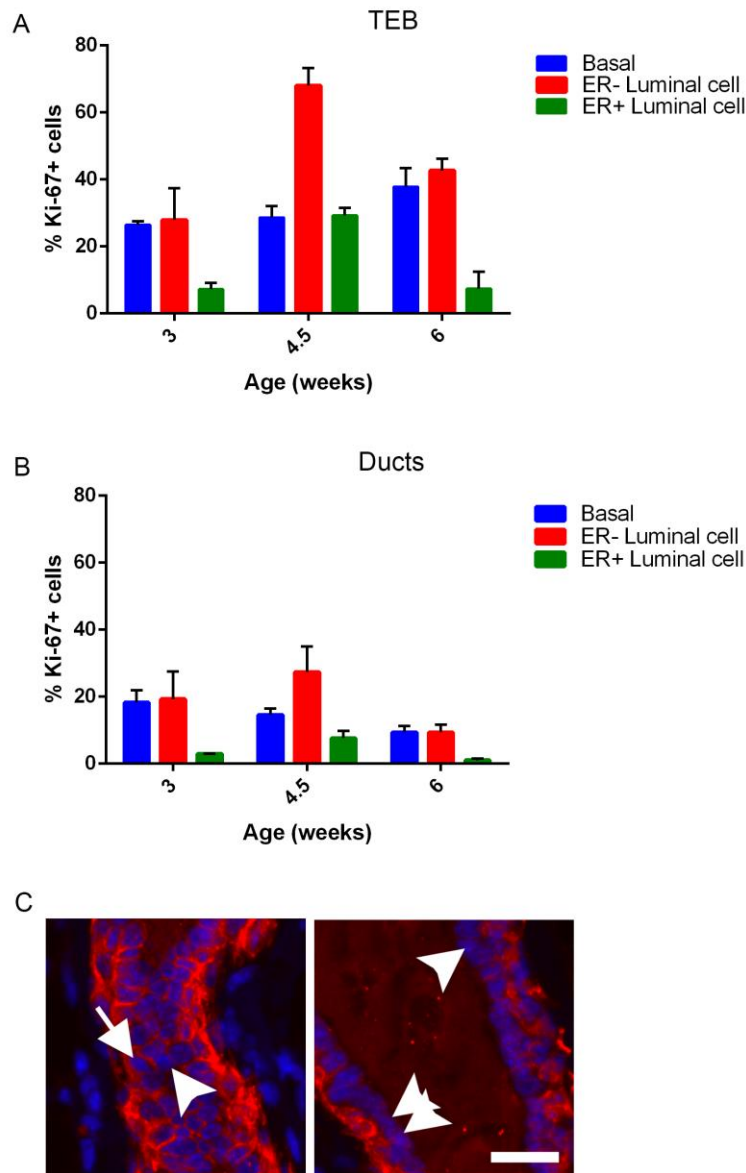

**Supplementary Figure 2. Cell division within the mammary epithelium.** Quantification data from Figure 2A was extracted and further divided into terminal end buds (A) and ducts (B) and samples recalculated to determine the percentage of Ki-67+ cells within the different developmental stages. (C) Representative zoomed image of CD49b staining from Figure 2D. Arrowheads depict CD49b- NCL cells and arrows indicate CD49b+ progenitors. Scale bar = 20  $\mu$ m.

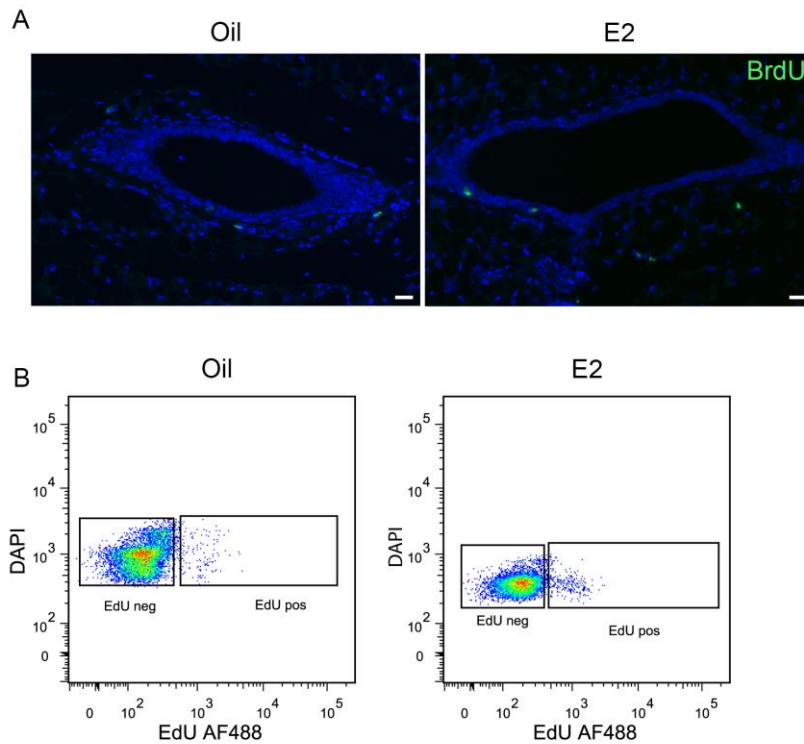

**Supplementary Figure 3. Estrogen alone does not induce cell proliferation.** Injection of 10  $\mu\text{g}$  of estrogen alone into ovariectomised mice does not induce cell division within the mammary epithelium. Adult ( $\geq 10$  week-old) mice were ovariectomised, and 7-14 days later, each was injected with either 10  $\mu\text{g}$  of estrogen or oil only, and were administered BrdU or EdU continuously via intraperitoneal injection and the drinking water. Mice were maintained for 8-48 hours, and nucleoside incorporation into the luminal epithelial cells was determined by (A) immunofluorescence microscopy (BrdU is indicated by green fluorescence; scale bar = 20  $\mu\text{m}$ ) or by (B) flow cytometry. No obvious differences in cell proliferation was observed among the epithelial cells (panel A) or the NCL cells (panel B) above background in oil-treated mice any of the experiments at any timepoints. A total of 6 mice estrogen-treated mice and 2 oil control mice were examined. These results are consistent with those reported in a previous study<sup>1</sup>.

**A** **Supplementary Table 1**

| Age (weeks) | Basal x 10 <sup>3</sup><br>(% of total epithelium) | Luminal x 10 <sup>3</sup><br>(% of total epithelium) | Sca1 <sup>+</sup> progenitor x 10 <sup>3</sup><br>(% of total epithelium) | Sca1 <sup>+</sup> progenitor x 10 <sup>3</sup><br>(% of total epithelium) | NCL x 10 <sup>3</sup><br>(% of total epithelium) |
|-------------|----------------------------------------------------|------------------------------------------------------|---------------------------------------------------------------------------|---------------------------------------------------------------------------|--------------------------------------------------|
| 3           | 5.4 ± 14<br>(76)                                   | 1.7 ± 0.3<br>(24)                                    | 0.7 ± 0.2<br>(10)                                                         | 0.15 ± 0.07<br>(2)                                                        | 0.35 ± 0.17<br>(5)                               |
| 4.5         | 38 ± 8<br>(45)                                     | 46 ± 14<br>(55)                                      | 9.6 ± 2.7<br>(11)                                                         | 4.2 ± 0.8<br>(5)                                                          | 27 ± 10<br>(32)                                  |
| 6           | 109 ± 13<br>(59)                                   | 77 ± 10<br>(41)                                      | 12 ± 2.5<br>(6)                                                           | 5.7 ± 2.1<br>(3)                                                          | 36 ± 5<br>(19)                                   |
| 10          | 131 ± 11<br>(37)                                   | 220 ± 61<br>(63)                                     | 32 ± 11<br>(9)                                                            | 18 ± 8.9<br>(5)                                                           | 121 ± 31<br>(34)                                 |

**B**

| Age (weeks) | Frequency of MRUs in unsorted cells<br>(95% CI) | Absolute number of MRUs per pair of inguinal glands | Absolute number of Ma-CFCs (x10 <sup>2</sup> ) per pair of inguinal glands |
|-------------|-------------------------------------------------|-----------------------------------------------------|----------------------------------------------------------------------------|
| 3           | 1 in 22,405<br>(1/7,358 to 1/68,228)            | 27                                                  | 11 ± 0.35                                                                  |
| 4.5         | 1 in 3,260<br>(1/1,785 to 1/5,954)              | 425                                                 | 37 ± 14                                                                    |
| 6           | 1 in 926<br>(1/640 to 1/1,340)                  | 1,403                                               | 56 ± 12                                                                    |
| 10          | 1 in 588<br>(1/801-1/431)                       | 5,811                                               | 300 ± 31                                                                   |

**Supplementary Table 1. Cellular content of the mammary gland during development.** (A) Absolute number and proportion of different types of cells present in the inguinal mammary glands of 3-10 week-old C57Bl6/J mice (n = 3-4 for each developmental stage). (B) Absolute number of MRUs and Ma-CFCs in the inguinal mammary glands of 3-10 week-old C57Bl6/J (n = 3 for Ma-CFC data, n = 3 to 18 for MRU data). Data is presented as the mean ± s.e.m.

## Supplementary Table 2

| BrdU exposure time (hours) | % of cells BrdU <sup>+</sup> and pH3 <sup>+</sup> |            |
|----------------------------|---------------------------------------------------|------------|
|                            | Basal                                             | Luminal    |
| 1                          | 19 ± 1.23                                         | 25.6 ± 7.8 |
| 6                          | 80.7 ± 1.8                                        | 86.5 ± 3.9 |
| 12                         | 20.3 ± 5.3                                        | 10.5 ± 3.1 |
| 24                         | 14.1 ± 3.6                                        | 15.0 ± 3.8 |

**Supplementary Table 2. Estimation of the length of S-phase.** Mice were administered BrdU once and at different time points between 1 to 24 hours the glands were removed and stained to detect the mitosis specific phospho-histone H3. Maximal dual staining is observed at 6 hours, which represents an approximation of the duration of S-phase. This is similar to the estimate of S-phase for mammalian cells, which has been calculated to be approximately 7 hours<sup>2</sup>. Data is presented as the mean ± s.e.m. from 3 independent mice for each timepoint.

**Supplementary Table 3****A**

| Mouse  | BrdU+<br>Sca1 <sup>-</sup><br>progenitor | BrdU+<br>Sca1 <sup>+</sup><br>progenitor | BrdU+<br>NCL |
|--------|------------------------------------------|------------------------------------------|--------------|
| 1      | 713                                      | 197                                      | 4,812        |
| 2      | 2,044                                    | 118                                      | 7,112        |
| 3      | 1,104                                    | 310                                      | 16,635       |
| Mean   | 1,287                                    | 208                                      | 9,519        |
| s.e.m. | 395                                      | 56                                       | 3,619        |

**B**

| Mouse | CldU+<br>Sca1 <sup>-</sup><br>progenitor | CldU+<br>Sca1 <sup>+</sup><br>progenitor | CldU+<br>NCL |
|-------|------------------------------------------|------------------------------------------|--------------|
| 1     | 12,867                                   | 680                                      | 7,630        |
| 2     | 7,782                                    | 744                                      | 6,599        |
| 3     | 1,973                                    | 241                                      | 10,315       |
| 4     | 6,204                                    | 1,269                                    | 22,980       |
| 5     | 5,177                                    | 773                                      | 26,468       |
| 6     | 3,267                                    | 819                                      | 28,706       |
| 7     | 5,607                                    | 736                                      | 39,890       |
| 8     | 2,263                                    | 720                                      | 20,296       |

**Supplementary Table 3. Absolute number of nucleoside<sup>+</sup> cells in different mammary cell subpopulations.** (A) Data extracted from Figure 2C, but shown for each individual mouse. (B) Number of different types of mammary epithelial cells in 8 different mice that incorporated CldU. Mice were injected twice with CldU, with each injection 6 hours apart and then glands dissociated into a single cell suspension 6 hours after last injection and the different subpopulations isolated by flow cytometry. CldU incorporation was then measured by immunofluorescence microscopy.

**Supplementary Table 4**

**A**

| Cell subpopulation           | Frequency of EdU <sup>+</sup> cells (%) | Proportion of all detectable EdU <sup>+</sup> cells (%) |
|------------------------------|-----------------------------------------|---------------------------------------------------------|
| Basal                        | 19±5                                    | 7±2                                                     |
| Sca1 <sup>-</sup> progenitor | 15±5                                    | 17±6                                                    |
| Sca1 <sup>+</sup> progenitor | 29±9                                    | 11±2                                                    |
| NCL                          | 13±2                                    | 64±7                                                    |

**B**

| Cell subpopulation           | Treatment condition | Frequency of EdU <sup>+</sup> cells (%) | Proportion of all detectable EdU <sup>+</sup> cells (%) |
|------------------------------|---------------------|-----------------------------------------|---------------------------------------------------------|
| Basal                        | Oil control         | 7.4±0.2                                 | -                                                       |
|                              | E + P               | 24±2                                    | 27±4                                                    |
| Sca1 <sup>-</sup> progenitor | Oil control         | 1.8±0.2                                 | -                                                       |
|                              | E + P               | 10±3                                    | 4±1                                                     |
| Sca1 <sup>+</sup> progenitor | Oil control         | 3.8±1.8                                 | -                                                       |
|                              | E + P               | 28±4                                    | 2±1                                                     |
| NCL                          | Oil control         | 0.8±0.2                                 | -                                                       |
|                              | E + P               | 46±6                                    | 67±3                                                    |

**Supplementary Table 4. Distribution of EdU<sup>+</sup> cells among mammary cell populations.** (A) Adult C57Bl6/J mice in proestrus were treated with EdU via the drinking water before culling for analysis at metestrus and the frequency and distribution of EdU<sup>+</sup> cells for each epithelial subpopulation was determined. Data presented as the mean ± s.e.m from 5 independent mice. (B) Adult mice were ovariectomised, and two weeks later, each was injected with 10 µg of estrogen and administered EdU via the drinking water. Twenty-four hours later, the mice were injected with 10 µg of estrogen and 1 mg of progesterone and 48 hours later the mice were culled and the frequency of EdU<sup>+</sup> cells in the basal, Sca1<sup>-</sup> progenitor, Sca1<sup>+</sup> progenitor and NCL subpopulations was determined. As well, the distribution of all detectable EdU<sup>+</sup> cells in each subpopulation was determined after correcting for population sizes. Mice injected with oil served as controls. Data is presented as the mean ± s.e.m. from 4 independent mice for estrogen and progesterone treatment, and 2 independent mice for oil controls.

**Supplementary Table 5**

| Estrus stage | Dose  | Take rate | MRU freq (95% CI)          | Total MRUs |
|--------------|-------|-----------|----------------------------|------------|
| Proestrus    | 5,000 | 3/3       | 1/589<br>(1/272-1/1,275)   | 7,152      |
|              | 2,000 | 3/3       |                            |            |
|              | 1,000 | 2/2       |                            |            |
|              | 500   | 2/3       |                            |            |
|              | 200   | 1/8       |                            |            |
| Estrus       | 5,000 | 2/2       | 1/760<br>(1/342-1/1,691)   | 4,550      |
|              | 2,000 | 1/1       |                            |            |
|              | 1,000 | 3/3       |                            |            |
|              | 200   | 2/15      |                            |            |
| Metestrus    | 5,000 | 9/9       | 1/1,271<br>(1/768-1/2,102) | 2,288      |
|              | 2,000 | 6/9       |                            |            |
|              | 1,000 | 5/8       |                            |            |
|              | 500   | 1/3       |                            |            |
|              | 200   | 2/10      |                            |            |
| Diestrus     | 5,000 | 1/1       | 1/208<br>(1/138-1/314)     | 16,702     |
|              | 2,000 | 1/1       |                            |            |
|              | 1,000 | 3/3       |                            |            |
|              | 200   | 24/39     |                            |            |

**Supplementary Table 5. MRU numbers during the estrus cycle.** The absolute number of MRUs per pair of inguinal glands in adult C57Bl6/J mice in different stages of the estrus cycle was determined by limiting dilution analysis (n = 3-7 donor mice analysed for each estrus stage). Asterisks indicate \*\*\* p<0.001, \*\* p<0.01, \* p<0.05 (as determined by using the Extreme Limiting Dilution Analysis online tool (<http://bioinf.wehi.edu.au/software/elda/>)).

## Supplementary References

1. Beleut, M. et al. Two distinct mechanisms underlie progesterone-induced proliferation in the mammary gland. *Proceedings of the National Academy of Sciences* 107, 2989-2994, doi:10.1073/pnas.0915148107 (2010).
2. Cameron, I. L. & Greulich, R. C. Evidence for an essentially constant duration of DNA synthesis in renewing epithelia of the adult mouse. *J Cell Biol* 18, 31-40 (1963).
